## The emergence, evolution, and diversification of the miR390-*TAS3*-*ARF* pathway in land plants

Rui Xia<sup>1,2,3\*</sup>, Jing Xu<sup>2,3</sup>, Blake C. Meyers<sup>3, 4\*</sup>

1. State Key Laboratory for Conservation and Utilization of Subtropical Agro-Bioresources, South China Agricultural University, Guangzhou, 510642, China
2. College of Horticulture, South China Agricultural University, Guangzhou 510642, China.
3. Donald Danforth Plant Science Center, St. Louis, MO 63132, USA.
4. University of Missouri – Columbia, Division of Plant Sciences, 52 Agriculture Lab, Columbia, MO 65211, USA.

\*Corresponding author email addresses: [bmeyers@danforthcenter.org](mailto:bmeyers@danforthcenter.org); [rxia@scau.edu.cn](mailto:rxia@scau.edu.cn)

## 1 **Abstract**

2 In plants, miR390 directs the production of tasiRNAs from *TRANS-ACTING SIRNA 3 (TAS3)* transcripts to  
3 regulate *AUXIN RESPONSIVE FACTOR (ARF)* genes, transcription factors critical for auxin signaling; these  
4 tasiRNAs are known as tasiARFs. This pathway is highly conserved, with the *TAS3* as the only one  
5 noncoding gene present almost ubiquitously in land plants. To understand the evolution of this miR390-  
6 *TAS3-ARF* pathway, we characterized homologs of these three genes from thousands of plant species,  
7 from bryophytes to angiosperms. Both miR390 and *TAS3* are present and functional in liverworts,  
8 confirming their ancestral role to regulate *ARFs* in land plants. We found the lower-stem region of  
9 *MIR390* genes, critical for accurate DCL1 (DICER-LIKE 1) processing, is conserved in sequence in seed  
10 plants. We propose a model for the transition of functional tasiRNA sequences in *TAS3* genes occurred  
11 at the emergence of vascular plants, in which the two miR390 target sites of *TAS3* genes showed distinct  
12 pairing patterns in different plant lineages. Based on the cleavability of miR390 target sites and the  
13 distance between target site and tasiARF we inferred a potential bidirectional processing mechanism  
14 exists for some *TAS3* genes. We also demonstrated a tight mutual selection between tasiARF and its  
15 target genes, and characterized unusual aspects and diversity of regulatory components of this pathway.  
16 Taken together, these data illuminate the evolutionary path of the *miR390-TAS3-ARF* pathway in land  
17 plants, and demonstrate the significant variation that occurs in the production of tasiRNAs in plants,  
18 even in the functionally important and archetypal miR390-*TAS3-ARF* regulatory circuit.

## 19 Introduction

20 In plants, small RNAs (sRNAs) play crucial regulatory functions in growth and development,  
21 resistance to abiotic and biotic stresses, and reproduction (Chen 2009; Axtell 2013; Bartel 2009). Based  
22 on features such as their biogenesis and function, sRNAs are classified into two major groups,  
23 microRNAs (miRNAs) and small interfering RNAs (siRNAs). miRNAs are generated from precursor mRNAs  
24 that fold back to form double-stranded stem-loop structures, while siRNAs are produced from double-  
25 stranded RNAs (dsRNAs) biosynthesized secondarily by RNA-dependent RNA polymerase (RDR) (Axtell  
26 2013). *Trans*-acting small interfering RNAs (tasiRNAs) are a special type of small RNAs found only in  
27 plants, so far. Precursor genes of tasiRNAs (*TAS* genes) are sliced in a miRNA-directed event, and the  
28 cleaved fragment is made double-stranded by RDR6; the resulting dsRNA is chopped by DICER-LIKE 4  
29 (DCL4) into 21-nt siRNAs that map back to the precursors in a head-to-tail arrangement initiating from  
30 the miRNA cleavage site (Allen et al. 2005; Yoshikawa et al. 2005).

31 Among plant *TAS* genes, the most well-studied is *TAS3*; its transcript bears two target sites of  
32 miR390, generating tasiRNAs via the so-called “two-hit” mechanism (Axtell et al. 2006). The conserved,  
33 resulting tasiRNA is known as “tasiARF” as it targets auxin responsive factor (*ARF*) genes (Allen et al.  
34 2005; Axtell et al. 2006). To date, there are two kinds of *TAS3* genes described in plants; one contains a  
35 single, centrally-located tasiARF, while the other generates two tasiARFs denoted as *TAS3*-short (*TAS3S*)  
36 and *TAS3*-long (*TAS3L*), respectively (Xia et al. 2015b). In *TAS3L*, only the 3' miR390 target site is  
37 cleavable and this sets the phase of tasiRNA production, giving rise to the two in-phase tasiARFs (Allen  
38 et al. 2005; Axtell et al. 2006). The 5' target site of *TAS3L* is usually non-cleavable because of the  
39 presence of a central mismatch (10<sup>th</sup> position) in the pairing of miR390 and target site (Axtell et al. 2006).  
40 It serves as an important binding site of ARGONAUTE 7 (AGO7), a specialized protein partner of miR390  
41 (Montgomery et al. 2008a). In contrast, both target sites of *TAS3S* are cleavable, and both can  
42 potentially initiate tasiRNA generation (Howell et al. 2007; Xia et al. 2012, 2015b). The single tasiARF of  
43 *TAS3S* is in near-perfect phasing to both miR390 sites as there is only 2-nt difference between the phase  
44 registers set by the two target sites (Xia et al. 2012, 2015b).

45 Auxin, a plant hormone, regulates seemingly every aspect of plant growth and development. The  
46 small class of ARF transcription factors can either activate or repress expression of downstream auxin-  
47 regulated genes through protein–protein interactions with auxin/indole-3-acetic acid (Aux/IAA) family  
48 members (Guilfoyle and Hagen 2007). Plant genomes contain ~10 to 30 *ARF* genes; for example, there  
49 are 23 members in the model plant *Arabidopsis*. ARFs are classified into three clades: ARF5/6/7/8 (Clade  
50 A), ARF1/2/3/4/9 (Clade B), and ARF10/16/17 (Clade C) (Finet et al. 2013). The *TAS3*-derived tasiARF

51 specifically targets *ARF* genes of Clade B. This miR390-*TAS3*-*ARF* pathway is of critical function in the  
52 regulation of plant growth and development, including leaf morphology, developmental timing and  
53 patterning, and lateral root growth (Garcia et al. 2006; Fahlgren et al. 2006; Adenot et al. 2006; Marin et  
54 al. 2010; Hunter et al. 2006). Loss-of-function mutants of AGO7, the specialized AGO partner of miR390,  
55 show varying degrees of growth and developmental disorders due to the malfunction of the tasiARF  
56 pathway (Yifhar et al. 2012; Zhou et al. 2013; Dotto et al. 2014). For example, maize *ago7* (*leafbladeless1*)  
57 plants have thread-like leaves lacking top/bottom polarity (Dotto et al. 2014), and Medicago *ago7* (*lobed*  
58 *leaflet1*) mutant plants displayed lobed leaf margins and extra lateral leaflets (Zhou et al. 2013).

59 All three components of the pathway, miR390, *TAS3*, and *ARFs*, are present in the oldest land  
60 plants, liverworts (Krasnikova et al. 2013; Finet et al. 2013). Interestingly, in bryophytes, the *TAS3* genes  
61 are different from those found in flowering plants. Although bryophyte *TAS3* genes also have two  
62 miR390 target, they generate tasiRNAs targeting not only *ARF* genes but also *AP2* genes (described, for  
63 example, in the moss *Physcomitrella patens*) (Axtell et al. 2007). Moreover, the bryophyte *ARF*-targeting  
64 tasiRNA is a different sequence compared to the tasiARF in flowering plants (Allen et al. 2005; Axtell et  
65 al. 2007). How and when this transition in *TAS3* gene composition occurred in the evolution of land  
66 plants is fascinating but unknown. We recently characterized ~20 *TAS3* genes in the gymnosperm  
67 Norway spruce (*Picea abies*), demonstrating diverse features of these genes distinct from those  
68 characterized in flowering plants (Xia et al. 2015a). In this study, we aimed to understand the  
69 evolutionary history of and critical changes in the miR390-*TAS3*-*ARF* pathway for the major lineages of  
70 land plants. We used > 150 plant genomes and the large dataset from the 1000 Plant Transcriptomes  
71 (1KP) project, in combination of additional sequencing data and computational approaches; these  
72 resources identified hundreds of *MIR390* genes and thousands of *TAS3* and *ARF* genes, across numerous  
73 plant species. From these data, we elucidated with high-resolution the dynamic nature of the  
74 evolutionary route of the miR390-*TAS3*-*ARF* pathway, revealing new regulatory features of the three  
75 critical components of the pathway.

76

77

## 78 Results

### 79 *Gene identification from plant genomic and transcriptomic data*

80 miR390-*TAS3*-*ARF* comprise a regulatory pathway highly conserved in plants. To maximize the  
81 possibility of characterizing the full diversity of the three main components of this pathway (miR390,  
82 *TAS3*, and *ARF* genes), we collected 159 sequenced plant genomes, ranging from liverworts to  
83 angiosperms, plus the 1KP data (Matasci et al. 2014). For the identification of *TAS3* genes, only genomic  
84 loci from sequenced genomes or transcripts (from 1KP data) containing at least one miR390 target site  
85 and one tasiRNA targeting *ARF* gene were considered valid for our analysis. Using bioinformatics tools  
86 and customized scripts (see Methods), we identified 374 *MIR390* genes from 163 plant species, 1923  
87 *TAS3* genes from 792 species, and 2912 *ARF* genes (targets of tasiRNAs) from 934 species. We were  
88 unable to identify homologs of *MIR390* or *TAS3* genes in five algal genomes, consistent with the earlier  
89 conclusion that the miR390-*TAS3*-*ARF* pathway originated in land plants (Krasnikova et al. 2013).

90 To evaluate the evolutionary changes of three components of the pathway, we classified all the  
91 plant species into one of seven groups (liverworts, mosses, monilophytes or ferns, gymnosperms, basal  
92 angiosperms, monocots, eudicots); each group was considered independently in our subsequent  
93 assessments. Monocots and eudicots accounted for the two largest groups of species and yielded the  
94 vast majority of *MIR390* genes; many fewer were identified in the liverwort, monilophyte, and basal  
95 angiosperm groups (Fig. S1A). Similarly, most of the *TAS3* genes identified were from angiosperms,  
96 although there were many from gymnosperms as well (Fig. S1A).

97 We next examined variation in the length and GC content of *MIR390* and *TAS3*. Flanking  
98 sequences of 50 bp (5' of the miR390 and 3' of the miR390\* for *MIR390*; 5' of the 5' miR390 target site  
99 and 3' of the 3' target site for *TAS3* genes) were included for these analyses. The length of the *MIR390*  
100 genes ranged from approximately 150 bp to 250 bp, with the *MIR390* copies in monocots significantly  
101 larger than those in gymnosperms (2.00E-05, t-test) and eudicots (4.00E-07, t-test) (Fig. S1B, at left). The  
102 GC content of *MIR390* genes was similar among different plant groups, with the exception of the  
103 eudicots in which they had a substantially lower GC content (1.40E-09, t-test) (Fig. S1C, at left). For the  
104 *TAS3* genes, their length was noticeably shorter in monilophytes, while significantly longer in  
105 gymnosperms than in monocots and eudicots (2.00E-16, t-test); in gymnosperms, there is an apparently  
106 bimodal distribution of lengths, possibly reflecting that there are two major types of *TAS3* genes of  
107 different length (Fig. S1B, at right). The GC content of the *TAS3* genes of two groups, the mosses and

108 eudicots, was exceptional: the moss *TAS3* genes were of higher GC content ( $2.00E-16$ , t-test), while the  
109 eudicot *TAS3* genes had a much lower GC content ( $2.00E-16$ , t-test, Fig. S1C, at right).

110 In Arabidopsis, the proper execution of the miR390-*TAS3*-*ARF* pathway requires that miR390 is  
111 loaded into a specific and highly selective AGO partner protein, AGO7 (Montgomery et al. 2008a). AGO7  
112 is an indispensable component of the pathway, and thus we also investigated the evolutionary history of  
113 AGO7. To complement our recent survey of AGO proteins that mainly focused on flowering plants  
114 (Zhang et al. 2015), our analyses here focused on AGO proteins from non-flowering plants. We identified  
115 237 AGO protein sequences with  $\geq 800$  amino acids, and these were used for the construction of a  
116 phylogenetic tree in combination with AGO proteins from three representative angiosperms: *Amborella*  
117 *trichopoda*, *Oryza sativa*, and *Arabidopsis thaliana*. As previously documented (Vaucheret 2008; Mallory  
118 and Vaucheret 2010; Zhang et al. 2015), AGO proteins clustered into three major clades, AGO1/5/10,  
119 AGO2/3/7, and AGO4/6/8/9 (Fig. S2A). The AGO2/3/7 clade consisted of members all from vascular  
120 plants, except two moss AGO proteins (4\_Pp3c17\_350V3.1 from *Physcomitrella patens* and  
121 4\_Sphflax0148s0007.1 from *Sphagnum fallax*) (Fig. S2B); we interpreted this as an indication that the  
122 ancestor of the AGO2/3/7 clade likely separated from the AGO1/5/10 clade in mosses. Also, AGO7 was  
123 apparently not specified until the emergence of gymnosperms, as only gymnosperm and *Amborella*  
124 AGOs joined the eudicot AGO7 copies to form a subclade (Fig. S2B). These results suggest that the  
125 specific partner AGO of miR390, AGO7, emerged much later than the miRNA and the pathway, possibly  
126 to enable unique functions of the miR390-*TAS3*-*ARF* pathway in seed and flowering plants.

127

### 128 ***The lower stem region of MIR390 is under strong selection for conservation***

129 miR390 is one of the most ancient miRNAs, well conserved in land plants. During the course of  
130 evolution, *MIRNA* genes (i.e. the precursor mRNAs) are relatively labile, typically displaying conservation  
131 only in the sequences of the miRNA and miRNA\* in the foldback region (Jones-Rhoades et al. 2006;  
132 Fahlgren et al. 2010; Ma et al. 2010). Indeed, in our analysis, the sequences of miR390 and miR390\*  
133 were extremely conserved in land plants, as shown in the sequence alignment in Fig. 1A. Interestingly, in  
134 addition to the miR390/miR390\* region, we identified another two regions of relatively high  
135 conservation in the precursors (Fig. 1A); these are the sequences forming the lower stem of the *MIR390*  
136 stem-loop structure (Fig. 1B). They displayed a substantially greater consensus, especially for the seed  
137 plants, than any other regions of the precursors except the miR390/miR390\* duplex (Fig. 1A).

138 In plants, the release of a miRNA/miRNA\* duplex relies on two sequential cuts by DCL1 in the  
139 *MIRNA* stem-loop precursors. These two sequential cuts are directional, either base-to-loop or loop-to-

140 base. For base-to-loop processing, the first cut is defined by the distance from the miRNA/miRNA\*  
141 duplex to a large loop at the base; the distance is usually ~15 nt (Werner et al. 2010; Song et al. 2010;  
142 Mateos et al. 2010). miR390 is one such base-to-loop-processed miRNA (Bologna et al. 2013). The  
143 conservation in the *MIR390* lower stem, exemplified in Fig. 1B, is likely to maintain the consistent  
144 distance of ~15 nt to ensure the accuracy of the first cut by DCL1 of the *MIR390* stem-loop precursor.

145

#### 146 ***TAS3* originated to regulate *ARF* genes**

147 *TAS3* genes in bryophytes were firstly characterized in the moss *Physcomitrella patens*, consisting  
148 in that genome of a small family of six genes (Axtell et al. 2007; Arif et al. 2012). Many *TAS3* genes were  
149 subsequently described in mosses (Krasnikova et al. 2013). All known moss *TAS3* genes have similar  
150 sequence components: two miR390 target sites, a tasiRNA targeting *AP2* genes (tasiAP2), and a tasiRNA  
151 targeting *ARF* genes (tasiARF)(Axtell et al. 2007; Krasnikova et al. 2013). A *TAS3* gene was also identified  
152 in a liverwort *Marchantia polymorpha*, representing the most ancient extant lineage of land plants  
153 (Krasnikova et al. 2013). However, this *TAS3* gene was described to produce only a single tasiRNA of  
154 sequence similar to the moss tasiAP2. We found five *TAS3* genes from liverwort species in addition to  
155 that of *Marchantia polymorpha*. Sequence alignment of these six liverwort genes revealed the presence  
156 of another conserved region, aside from the two miR390 target sites and the previously-described  
157 tasiAP2, that could also produce an siRNA (Fig. 2A). Analyses of public sRNA data from *Marchantia*  
158 *polymorpha* showed that a highly abundant tasiRNA was produced from the anti-sense strand of this  
159 siRNA site. This tasiRNA (hereafter, “tasiARF-a1”) was predicted to target an *ARF* gene in *M. polymorpha*,  
160 with the cleavage of the target site confirmed by PARE analysis (Fig. 2A). While the previously-described  
161 tasiAP2 site is highly conserved, we were unable to validate its target interaction in *M. polymorpha* in  
162 which we attempted by combining whole genome target analysis with sRNA and PARE data. This is likely  
163 for several reasons: first, the corresponding tasiRNA was produced of low abundance; second, no *AP2*  
164 homolog was predicted as a target of the tasiRNA even using relaxed prediction criteria (alignment score  
165  $\leq 7$ ); third, after checking *M. polymorpha* homologs of moss *AP2* genes that are validated targets of  
166 moss tasiARF-a1, we found no tasiAP2 target sites (data not shown). Therefore, the miR390-*TAS3*  
167 machinery likely originated to regulate *ARF* genes, and not *AP2* genes, unlike previous reports.

168 For the bryophytes, we identified a large number of *TAS3* genes including 67 genes from 36 moss  
169 species), in addition to the six liverwort *TAS3* copies described above. For the 67 genes, we built a  
170 multiple sequence alignment; from this, conserved sequence motifs, including the two miR390 target  
171 sites, and both tasiAP2 and tasiARF, were detected as previously reported and as observed in the

172 mosses (Fig. S3A). In addition, we identified another tasiRNA site which is conserved only in a subset of  
173 the moss *TAS3* genes. Target predictions indicated that this tasiRNA may target *ARF* genes as well, and it  
174 is conserved in only a few members of the *TAS3* family, for instance, three *TAS3* genes of *P. patens*  
175 (*a/d/f*) encode this tasiRNA sequence, but *TAS3b/c/e* lack it (Fig. 2B and Fig. S3A). In contrast to the  
176 previously-identified tasiARF (tasiARF-a2, on the 3' end) which was produced in the antisense strand and  
177 in phase with the 3' miR390 target site, the newly identified tasiARF-a3 is located in the sense strand  
178 and in phase with the 5' miR390 target site (Fig. 2B). These three tasiARFs in liverworts (tasiARF-a1) and  
179 mosses (tasiARF-a2, -a3) have no sequence similarity, originate from either strand of *TAS3* genes, and  
180 target different regions of *ARF* genes, consistent with independent origins.

181 The distribution of tasiARF-a2 and -a3 in moss *TAS3* genes is consistent with distinct evolutionary  
182 paths for these genes. To infer the possible evolutionary paths of *TAS3* in bryophytes, we constructed a  
183 phylogenetic tree using their *TAS3* genes. The phylogenetic tree (Fig. S3B) yielded three major classes:  
184 class I contained all six liverwort *TAS3* genes (tasiAP2 and tasiARF-a1); class II included moss *TAS3* genes  
185 containing tasiAP2 and tasiARF-a2; and class III comprised moss *TAS3*s with tasiAP2, tasiARF-a2, and  
186 tasiARF-a3. Intriguingly, class II is closer to liverwort *TAS3* genes (class I), indicating that class III *TAS3*s  
187 likely evolved after the appearance of the class II *TAS3* genes, which raises an interesting question of the  
188 origin of tasiARF-a3.

189

### 190 ***The evolutionary path of TAS3 genes in land plants***

191 *TAS3* genes found in seed plants are different from the bryophyte *TAS3*s. As summarized in Fig. 3A,  
192 two types of *TAS3* genes, *TAS3L* with two tandem tasiARFs and *TAS3S* with one tasiARF, have been  
193 previously characterized in gymnosperms and many angiosperms. Despite a similar arrangement of two  
194 miR390 target sites, the near-identical tasiARFs in *TAS3L* and *TAS3S* are distinct from moss tasiARFs  
195 (tasiARF-a1/a2/a3) in bryophyte *TAS3* genes, in terms of sequence, position and strand (Fig. 3A). These  
196 differences suggest a significant change occurred during *TAS3* evolution in land plants. To better  
197 understand when this change happened, we cataloged *TAS3* genes with tasiARFs; we found two *TAS3*  
198 genes from a lycophyte *Phylloglossum drummondii*, one with two tasiARFs (*Pdr-TAS3L*) and the other  
199 with a single tasiARF (*Pdr-TAS3S*) (Fig. 3B). The cDNA sequence of *Pdr-TAS3S* was too short to include the  
200 5' miR390 target site. We generated sRNA sequencing data which confirmed the phased generation of  
201 tasiARFs from *Pdr-TAS3L* (Fig. 3C). Both tasiARFs were predicted to target two *ARF* genes, found among  
202 the cDNA sequences from the same species (Fig. 3C). Therefore, we believe that this transformation of  
203 *TAS3* genes, and particularly the tasiARF transition, occurred after mosses and before or in lycophytes,



204 perhaps with the emergence of vascular plants. Thus, we named all the *TAS3* genes producing these  
205 characteristic tasiARFs (i.e. not tasiARF-a1/a2/a3) as “vascular *TAS3*” genes.

206 We next asked how the transition of *TAS3* genes happened. In other words, how was this  
207 signature tasiARF sequence generated in vascular plants. We compared the tasiARF sequence to  
208 available cDNA or genome sequences. We found the tasiARF sequence shared substantial sequence  
209 similarity to a region partially overlapped with the 5' miR390 target site from the cognate *TAS3* gene in  
210 some species, as exemplified in a few *TAS3* genes shown in Fig. 3D. In a *TAS3* gene of the liverwort  
211 *Marchantia polymorpha* (*Mpo-TAS3*), the tasiARF sequence has 15 nucleotides of identity with the 5'  
212 miR390 target sequence, with an overlap of 11 nt. This sequence similarity is even greater in *TAS3* genes  
213 in a monotypic gymnosperm, *Welwitschia mirabilis* (*Wmi-TAS3*), and the basal angiosperm *Amborella*  
214 *trichopoda* (*Atrich-TAS3*) (Fig. 3D). This finding of sequence similarity is consistent with a hypothesis that  
215 the tasiARF was derived from the 5' miR390 target site from *TAS3*.

216 We previously reported that the genome of the gymnosperm Norway spruce includes a large  
217 number of *TAS3* genes, of which many have non-canonical sequence features (Xia et al. 2015a). We  
218 extended this observation to other plant species, finding *TAS3* genes with varied motif structures in our  
219 large dataset (Fig. S4). For example, some have two 5' or 3' target sites due to short sequence  
220 duplications; some have two or three non-adjacent tasiARFs. We propose a model, consistent with these  
221 extant *TAS3* arrangements, for the tasiARF transition from bryophyte *TAS3* genes to vascular *TAS3* genes  
222 (Fig. 3E). In the first step, the 5' miR390 target site of a bryophyte *TAS3* gene was duplicated through  
223 segmental duplication, as evidenced in a couple of gymnosperm *TAS3* genes. Next, the miR390 target  
224 site in the middle evolved into a tasiARF and was retained because of its essential function, yielding the  
225 short *TAS3* gene (*TAS3S*); after this, two tasiARFs in a single *TAS3* gene resulted from the duplication of  
226 tasiARF. Finally, the gap between the two tasiARFs was lost, forming a tandem repeat of tasiARFs,  
227 yielding the long *TAS3* gene (*TAS3L*) present in vascular plants. This series of steps is consistent with the  
228 *TAS3* variants present in plant genomes (Fig. S4).

229

### 230 ***Distinct pairing patterns of two miR390 target sites***

231 *TAS3* genes usually comprise a small gene family in plants. For instance, in bryophytes, only one  
232 *TAS3* gene was identified in *M. polymorpha*, and six *TAS3* copies in *P. patens*. For comparison, there are  
233 three *TAS3* copies in *Arabidopsis*, five in rice, and nine in maize – all vascular plants. Comparing across  
234 the 157 vascular plants with full-genome sequences that we utilized, we found that this size of the *TAS3*  
235 gene family is maintained across angiosperms, with most having fewer than ten *TAS3* genes and a mean

236 of four genes (Fig. S5). This is in a sharp contrast to gymnosperms in which the *TAS3* family is  
237 substantially larger. The five gymnosperm species surveyed have at least 28 copies of *TAS3* genes, with  
238 the *Pinus taeda* encoding as many as 71 *TAS3* copies. Another noticeable feature of the vascular *TAS3*  
239 genes is that almost all of the species have both variants of *TAS3* genes (*TAS3L* and *TAS3S*) (Fig. S5), from  
240 which we infer that these two types of *TAS3* genes likely have non-redundant functions.

241 We next evaluated how essential sequence motifs of *TAS3* genes changed in vascular plants. We  
242 identified 3684 target sites of miR390 in 1847 vascular *TAS3* copies, including 1793 5' sites and 1891 3'  
243 sites. These 5' and 3' miR390 sites showed different patterns of pairing with miR390, of which sequence  
244 is highly conserved (Fig. 4A). In general, the majority of the 5' sites encode a central, 10<sup>th</sup>-position  
245 mismatch, while the last four nucleotides of the pairing (18<sup>th</sup> to 21<sup>st</sup>, relative to the 5' end of miR390) are  
246 always mismatched in the 3' target site (Fig. 4A). More specifically, the middle region (8<sup>th</sup> to 12<sup>th</sup>  
247 nucleotides) of the 5' target site are of greater nucleotide diversity, with the 10<sup>th</sup> position generally  
248 unpaired and the 11<sup>th</sup> position is predominantly a G:U pair. In contrast, the 5' five nucleotides (17<sup>th</sup> to  
249 21<sup>st</sup>, relative to the 5' end of miR390) of the 3' target sites vary substantially in sequence, with the last  
250 four (18<sup>th</sup> to 21<sup>st</sup>) always unpaired with miR390. Noticeable is that the final nucleotide of the 3' site (1<sup>st</sup>  
251 relative to miR390) is not well conserved at all, maintained as a mismatch with miR390, unlike the 5' site  
252 (Fig. 4A).

253 To assess the history of diversification of the pairing between miR390 and its target sites in *TAS3*  
254 genes, we grouped all identified miR390 target sites according to the seven species lineages of land  
255 plants described above, and we generated similar plots to represent miR390-*TAS3* pairing. We observed  
256 substantial variation in pairing in the 5' site, especially for the middle region (8<sup>th</sup> to 12<sup>th</sup> positions) (Fig.  
257 4B). Interestingly, the position most important for AGO-mediated slicing, the 10<sup>th</sup> position (of miR390)  
258 was always matched in bryophytes, yet in later-diverged species, the mismatch at this position appeared  
259 and seemed preferentially retained, as the proportion of mismatches gradually increased over plant  
260 evolution. This was particularly noticeable in the basal angiosperms and monocots in which there were  
261 almost no matched interactions at this position. For the 11<sup>th</sup> position of the 5' site, G:U pairing  
262 predominated in all the lineages in spite of a substantial portion of perfect G:C pairing at the 10<sup>th</sup>  
263 position observed in Monilophytes (Fig. 4B). Regarding the 3' site, its main features do not vary much  
264 among the groups, including the 5' end mismatch region, the perfect match in the middle, and the high  
265 proportion of mismatches for the final nucleotide (except for the Monilophytes) (Fig. 4B).

266

267 ***Evolutionary dynamic distances between tasiARFs and miR390 target sites***

268 The tasiARF is another functionally essential component of the pathway of our investigation. To  
269 correctly generate the tasiARF, this siRNA needs to be in phase with a miR390 target site; in other words,  
270 the distance from the cleavage site of miR390 target site to the end of the tasiARF must be a multiple of  
271 21 nucleotides. Therefore, we calculated the distances and evaluated their evolutionary changes from  
272 both 5' and 3' miR390 target sites to the tasiARF ends. Given that the tasiARF in vascular plants is  
273 distinct from tasiARF-a1/a2/a3 found in bryophytes, which themselves vary substantially, and given the  
274 large number of *TAS3* genes identified for vascular plants, we performed distance analyses only for  
275 vascular *TAS3* genes.

276 Overall, there was substantial variation in the tasiARF distances (5'-site → tasiARF and tasiARF →  
277 3'-site) in all lineages of vascular plants, with the exception of the eudicots, in which the tasiARF → 3'-  
278 site distance of *TAS3L* and the 5'-site → tasiARF distance of *TAS3S* were highly consistent in length (Fig.  
279 5A and B). For *TAS3L*, both distances were significantly shorter in the Monilophytes, but the  
280 gymnosperms had a much longer 5'-site → tasiARF region compared with other lineages (Fig. 5A).  
281 Monilophyte *TAS3S* also had a shorter 5'-site → tasiARF region, but the tasiARF → 3'-site distance was  
282 more or less similar to those of other lineages (Fig. 5B).

283 Next, we assessed the distance from the tasiARFs to a miR390 cleavage site in terms of the phase  
284 cycles of phased siRNAs, to determine which site was the trigger. The tasiARFs of *TAS3L* are mostly out-  
285 of-phase with the 5' target site, with the exception of those from gymnosperms in which the tasiARFs  
286 are consistently positioned at the 9<sup>th</sup> cycles according to the cleavage site of the 5' site (Fig. 5C left). In  
287 contrast, the *TAS3L* tasiARFs are consistently in phase to the 3' site; in other words, the distances of the  
288 3'-site → tasiARF were almost uniformly a multiple of 21 nucleotides, despite considerable length  
289 variation in some groups (Fig. 5C). For *TAS3S*, its tasiARF is largely not in phase to the 5' site, except in  
290 the eudicots, which had a consistent 5'-site → tasiARF distance of approximately three cycles, or 65  
291 nucleotides. As with *TAS3L*, although variation in the length was observed for the 3' site → tasiARF  
292 region, the distance was almost uniformly phased as well, i.e. a multiple of 21 nucleotides (Fig. 5D).  
293 These results indicated that the 3' site is the main trigger site of tasiARF generation in both *TAS3L* and  
294 *TAS3S*, but the gymnosperm *TAS3L* and eudicot *TAS3S* likely also generate tasiARFs triggered by the 5'  
295 miR390 target site.

296

297 ***The cleavability of the 5' site and its in-phase tasiARF are selected coordinately***

298 The non-cleavable feature of 5' miR390 target site is functionally important for its role as a binding  
299 site of the miR390-RISC complex, and this non-cleavability results from the presence of a mismatch at  
300 the 10<sup>th</sup> position of the target site pairing (Montgomery et al. 2008b; Axtell et al. 2006). As  
301 aforementioned, our analysis of the middle region of the miR390:target-site pairing of the 5' site (Fig. 4B)  
302 demonstrated that, consistent with previous studies, the 10<sup>th</sup> position mismatch is indeed conserved in  
303 the majority of the *TAS3* genes in vascular plants. However, we also observed that a not-insignificant  
304 fraction of interactions of the 10<sup>th</sup> position of miR390 with *TAS3* are perfectly paired, especially in  
305 monilophytes, gymnosperms and eudicots (Fig. 4B). Given the finding that the tasiARF in gymnosperm  
306 *TAS3L* and eudicot *TAS3S* copies are mostly in phase with the 5' site as well, it is conceivable that the  
307 portion of matched 10<sup>th</sup> position is contributed by the 5' sites capable of setting the phase of the tasiARF.  
308 To check this possibility, we separated the 5' sites of *TAS3L* from those of *TAS3S*, and focused our  
309 analyses on the middle region (8<sup>th</sup> to 12<sup>th</sup> positions, relative to the miRNA), as shown in Fig. 5E and F.  
310 Although the general pattern was similar for *TAS3L* and *TAS3S*, i.e. a predominant 10<sup>th</sup> position  
311 mismatch in most lineages and preferential 11<sup>th</sup> position G:U pairing, we found a few dissimilarities  
312 between *TAS3L* and *TAS3S* in the pairing at these positions. Most noticeable was the level of perfect  
313 matches at the 10<sup>th</sup> position for *TAS3S* compared to the majority of mismatches in *TAS3L* at the same  
314 position (Fig. 5E). We then asked whether those 5' sites in phase to tasiARF were more likely to display a  
315 10<sup>th</sup> position perfect match or not. When we divided the 10<sup>th</sup> position into two groups, the matched  
316 group (with a "U" matching the 10<sup>th</sup> position "A" of miR390), and the mismatched group ("A", "C", or  
317 "G"), and we calculated the proportion of in-phase target sites and out-of-phase target sites, separately.  
318 The matched group had a much higher proportion of in-phase sites in eudicots (Fig. 5G), suggesting that  
319 the in-phase and cleavable 5' site was coordinately selected during *TAS3* evolution in eudicots.

320

### 321 ***Strong mutual selection between tasiARF and its target site in ARF genes***

322 The miR390-*TAS3*-*ARF* pathway exerts its function via the silencing of a subgroup of *ARF* genes,  
323 *ARF2/3/4* in Arabidopsis (Allen et al. 2005). In Arabidopsis, the *ARF* genes are classified into three clades  
324 Clade A (*ARF5/6/7/8*); Clade B (*ARF1/2/3/4/9*), and Clade C (*ARF10/16/17*) (Finet et al., 2012). The  
325 vascular tasiARFs target *ARF2/3/4* belong to Clade B, the ancestor of which likely emerged in liverworts  
326 (Finet et al. 2013). Typically, *ARF2* has a single target site for the tasiARF, and *ARF3/4* have two target  
327 sites (Allen et al. 2005; Axtell et al. 2006). As described above, the *ARF* genes in Clade B of bryophytes  
328 are regulated by tasiARF-a1 to -a3, thereafter in evolution, this group was targeted by the tasiARF that  
329 emerged in vascular plants. However, we found that some Clade B genes from mosses (for example,

330 from *P. patens*) bear analogous target site sequence of the vascular tasiARF, suggesting that this target  
331 site predates the emergence of the tasiARF of vascular *TAS3* genes (Fig. S6). Combining these data with  
332 the *ARF* evolution history illustrated in Finet et al. (2012), we summarized the likely path of  
333 diversification of tasiARF target sites during the evolution of the Clade B *ARF* genes (Fig. 6A). The  
334 interaction pattern of tasiARF with *ARF* genes was likely formed in lycophytes with only one target site.  
335 In Monilophytes, genes in Clade B are targeted at a single site in most species, but a few species display  
336 dual target sites. Thereafter, in evolutionary terms, this dual targeting was maintained in the subclade,  
337 and likely eventually gave rise to the *ARF3/4* genes, while the single targeting was selectively retained in  
338 the *ARF2* subclade, but lost in the *ARF1/9* group (Fig. 6A).

339 The target sites of vascular tasiARF were located in the middle region between two functional  
340 domains (ARF and AUX/IAA) of *ARF2/3/4* genes (Fig. 6B). We recently reported that the miR482/2118  
341 family displays significant sequence variation at positions matching the 3<sup>rd</sup> nucleotide of codons at the  
342 miRNA target site, implying a strong selection from the functionally important P-loop motif of NB-LRR  
343 proteins that shapes miRNA-target pairing (Zhang et al. 2016). In contrast, the tasiARF sequence is of  
344 much lower sequence divergence, and it did not show a pattern like the miR482/2118 family, indicating  
345 the selection on tasiARF pairing is distinct from the miR482/2118 case. Similarly, the tasiARF target sites,  
346 unlike the miR390 target sites in *TAS3* genes which are of considerable diversity, are less divergent in  
347 sequence, and consistently encode the amino acid sequence K/RVLQGQE (Fig. 6B). We also assessed  
348 nucleotide diversity of the *ARF2/3/4* genes and we found that the three functional domains were, as  
349 expected, of relatively low nucleotide diversity. However, the tasiARF target sites (one in *ARF2* and two  
350 in *ARF3/4*) showed substantially lower nucleotide diversity, even compared to the encoded, conserved  
351 functional domain, indicating a strong selection on them during evolution (Fig. 6C). Given the fact that  
352 tasiARF sequences in *TAS3* genes are also extremely conserved in vascular plants, we hypothesize that  
353 there is strong mutual selection between tasiARF in *TAS3* genes and its target sites in *ARF* genes.

354

### 355 ***New regulatory mechanism of TAS3 genes***

356 When we were annotating *TAS3* genes, we observed several other previously-undescribed  
357 features of the *TAS3* gene family. First, we found a few vascular *TAS3* genes that display transcript  
358 isoforms generated by alternative splicing. A good example is the *TAS3c* locus in maize, in which many  
359 alternative splicing sites giving rise to numerous transcript isoforms (Fig. 7A). These isoforms selectively  
360 spliced out the three essential components of the *TAS3* gene; for instance, the 5' site is missing for splice  
361 variant T4, the 3' site is missing for T1 and T2, both target sites missing for T5, T8 and T9, and all of the

362 target sites and tasiARFs missing for T7, T10 and T13 (Fig. 7A). While we currently have no evidence of  
363 functional relevance for these variants, it's possible that alternative splicing can serve as another layer  
364 of regulation to fine-tune the activity of *TAS3* genes and subsequent tasiARF production. For example,  
365 there is evidence that small ORFs encoded by *TAS* genes play functional roles (Yoshikawa et al., 2016),  
366 and these splice variants could mediate ribosome loading, stalling, or peptide production, independent  
367 of tasiRNA biogenesis.

368 Another new feature that we observed is an abnormal pairing interaction of miR390 with a few  
369 target sites in *TAS3* genes; this pairing displays large bulges in the seed sequence region (2<sup>nd</sup> to 13<sup>th</sup>  
370 positions) (Fig. 7B). The first example is the *TAS3-1* gene in soybean (*Glycine max*). We can infer based  
371 on the register of the siRNAs that its 3' target site is cleaved to set the phasing, despite a predicted 4-nt  
372 bulge present between the 6<sup>th</sup> and 7<sup>th</sup> positions of miR390 (Fig. 7B). Another three cases were predicted  
373 to generate an 8- or 3-nt bulge (Fig. 7B). This type of abnormal, bulge-containing miRNA-target  
374 interaction was recently reported and validated in Arabidopsis for miR398 (Brousse et al. 2014), the only  
375 other known case of this type. Our results suggest that this is pairing is not unique to miR398, and large  
376 asymmetrical bulges in miRNA:target pairing are at least allowable in plants.

377

378

## 379 Discussion

380 The presence of miR390 and *TAS3* was tracked back to liverworts (Lin et al. 2016), while the ARF  
381 domain encoded by *ARF* genes likely first appeared in the land plants (Finet et al. 2013). We  
382 demonstrated that *TAS3* in liverworts produces tasiRNAs to target *ARF* genes, suggesting this was the  
383 earliest function of *TAS3*, a key function maintained throughout land plants. We also observed in  
384 liverworts the conservation of another *TAS3*-derived tasiRNA that, in mosses, targets *AP2* genes  
385 (referred to as tasiAP2), but we were unable to confirm this function in liverworts. It is possible that this  
386 tasiRNA in liverwort *TAS3* genes emerged before the appearance of tasiAP2 target sites in *AP2* genes, or  
387 this tasiRNA has an unidentifiable function or target.

388 Although the role of *TAS3* in regulating *ARF* genes is conserved across land plants, the bryophyte  
389 *TAS3* genes are structurally different from those in vascular plants (Axtell et al. 2006). In other words,  
390 tasiARFs are different in sequence between bryophytes and vascular plants. In our model for tasiARF  
391 evolution, the tasiARF was derived from the duplication of the 5' target site of miR390, and the short  
392 *TAS3* variant (*TAS3S*) is the ancestor of the long *TAS3* (*TAS3L*). We identified the vascular *TAS3* in a  
393 lycophyte, indicating the transition of tasiRNA sequences is likely associated with the development of  
394 vascular tissue in plants, as lycophytes were among the first vascular plants on earth. Measured across  
395 the vascular plants, there are nearly always two types of *TAS3* genes (*TAS3S* and *TAS3L*) present in each  
396 plant genome and totaling approximately four members in most species. The deep conservation of  
397 these structures suggests they are not functionally redundant. Future work could address why, perhaps  
398 by selective deletion of the two types using CRISPR/Cas9. Another striking observation was that the  
399 *TAS3* copy number is significantly expanded in conifers, reminiscent of the expansion of *NB-LRR*-  
400 targeting miRNAs (Xia et al., 2015). Despite evidence of whole genome duplications in spruce (Li et al.  
401 2015), the >10-fold higher copy number in conifers relative to angiosperms is extraordinary. Perhaps  
402 functional differences in tasiRNA movement in gymnosperms required added copies of *TAS3* genes, but  
403 these copies were made redundant and lost by angiosperm-specific evolutionary adaptations, possibly  
404 improved tasiRNA mobility.

405 In plants, miRNA/miRNA duplexes are released by two sequential cuts of their hairpin precursors  
406 by DCL1; these cuts can occur either base-to-loop or loop-to-base (Bologna et al. 2009, 2013). For other  
407 miRNAs, it was observed that a conserved length of the basal stem region ensures accurate cuts made  
408 by DCL1 (Werner et al. 2010; Song et al. 2010; Mateos et al. 2010). We found that miR390 is processed  
409 in a base-to-loop direction, with the first cut by DCL1 occurring at a position ~15 nt from a basal  
410 unpaired region (> 4 nt). While this basal region (the unpaired region to the site of the first cut) is a

411 length consistent with other base-to-loop processed miRNAs, by comparison across the seed plants, we  
412 found that the sequence is also relatively conserved, indicating that selection can maintain bases in the  
413 hairpin other than the miRNA/miRNA\*.

414 One of the major differences between two main mechanisms of tasiRNA/phasiRNA biogenesis  
415 (“one-hit” and “two-hit” models) is the direction of tasiRNA production. In the “two-hit” model,  
416 tasiRNAs are produced in a 3’ to 5’ direction, in contrast to the predominant 5’ to 3’ Dicer processing (i.e.  
417 the “one-hit” model). miR390-*TAS3* is the quintessential “two-hit” locus, yet its 3’ to 5’ processing is  
418 distinctive and rare. Evolutionary analyses of miR390-*TAS3* pairing revealed two distinct patterns of  
419 pairing of the two target sites: (i) a conserved mismatched region mainly caused by the 10<sup>th</sup> position of  
420 the 5’ site (previously known – see below), and (ii) an open, unpaired region in the 3’ end of the 3’ target  
421 site (from our study). The wide conservation in vascular plants of these features implies functional  
422 relevance. Studies in *Arabidopsis* have shown that the non-cleavability of the 5’ site, caused by the  
423 central mismatch (10<sup>th</sup> position), is essential, mediating miR390 binding via AGO7 (Rajeswaran and  
424 Pooggin 2012). Changing the 10<sup>th</sup> mismatch into a perfect match compromises tasiRNA biogenesis  
425 (Axtell et al. 2006; Montgomery et al. 2008a). However, a substantial portion of *TAS3* genes, especially  
426 the *TAS3S* subset, having a cleavable 5’ site (A:U pair at the 10<sup>th</sup> position), and many of these sites,  
427 particularly in eudicots, trigger tasiARF production. This indicates that the non-cleavability of the 5’ site  
428 is helpful but not necessary for tasiARF production. Another notable feature of the 5’ site pairing is the  
429 predominant G:U pairing at the 11<sup>th</sup> position; this preferential wobble pairing might be helpful for  
430 maintaining the non-cleavability of the 5’ site, which is believed to be mainly caused by the 10<sup>th</sup> position  
431 mismatch. In contrast, the pairing of the 3’ site has a consistently matched middle region, but an open,  
432 unpaired 3’ end region. The paired middle region could ensure the cleavage of the 3’ site, make it the  
433 typical trigger site for secondary tasiRNAs. The 3’ end open region may direct the 3’ to 5’ production of  
434 *TAS3* tasiRNAs. Perhaps after cleavage, the 3’ end open region makes the cleaved mRNA end more  
435 accessible to RDR6 to facilitate downstream tasiRNA production.

436 Besides the cleavability of the target site, the distance between the miR390 target site and tasiARF  
437 also appears to be a determinant for phasiRNA biogenesis. tasiARF production requires distances in  
438 multiples of 21 nucleotides from the cleavage site (“in register”). We showed that the distance of the 3’  
439 side of *TAS3* is more consistently a multiple of 21 nt despite considerable length variation; the 3’ site  
440 also displayed fewer 10<sup>th</sup> position mismatches (i.e. better cleavability). However, we noted several  
441 exceptions. The *TAS3L* in gymnosperms and the *TAS3S* in eudicots had a highly consistent distance on  
442 the 5’ side, in approximate phase with tasiARF, and the cleavability of the 5’ site is coordinately selected



443 with the in-phase distance to the tasiARF in eudicots, suggesting that the 5' site in those *TAS3* genes is  
444 likely to serve as a trigger site of tasiARF production as well. Therefore, our results suggest that some  
445 *TAS3* loci in vascular plants are likely bi-directionally processed, consistent with the observation of the  
446 original bidirectional processing of functional tasiRNAs in bryophytes (Axtell et al. 2006). For instance,  
447 the two target sites of *TAS3* in *P. patens* are both cleavable, and tasiARF-a2 is in phase with the 3' site  
448 while tasiARF-a3 is in phase with the 5' site. This bidirectional processing thus yields additional questions  
449 about this "two-hit" mechanism. How is the activity of the two sites coordinated? Does cleavage occur  
450 simultaneously at both sites or one site at a time?

451 miRNAs, tasiRNAs, or other type of sRNAs and their targets genes are a pair of partners,  
452 functioning via their interactions, based on sequence complementarity. Few studies have deeply  
453 investigated this sRNA:target partnership over evolutionary time. In the case of the widely conserved  
454 miR482/2118 family, we described selection from target protein-coding genes to miRNAs; in other  
455 words, the essential function of the P-loop encoded in *NB-LRR* genes, targeted by miR482/2118, is most  
456 important, as miRNA variation matches a degenerate nucleotide change at the third position of each  
457 codon in the target (Zhang et al. 2016). In the current study, we detected a distinct pattern of selection  
458 between tasiARF and target site in *ARF* genes in vascular plants. Both are depleted of variation,  
459 indicating a strong mutual selection. The tasiARF target site sequences in *ARF* genes show no periodical  
460 variation (at the third position), indicating the target site sequence is not under strong selection at the  
461 amino acid level, in accordance with the location of the tasiARF target site between two encoded  
462 domains of ARF proteins, the ARF domain and AUX/IAA domain. The target site in the middle region is of  
463 less functional importance at the protein level. This is in contrast to the location of miR482/2118 target  
464 site in a functionally critical domain (Zhang et al. 2016). However, the sequence variation (nucleotide  
465 diversity) of the tasiARF target sites in *ARF* genes is dramatically less than other gene regions, even the  
466 conserved functional protein domains, suggesting that the tasiARF target site is under a selective force  
467 stronger than selection than that of the encoded protein domains. Combined with the fact that tasiARF  
468 sequences in vascular *TAS3* copies demonstrate substantially less sequence variation, we believe that  
469 there is a robust selective connection between tasiARF and its target site in *ARF* genes, which permit  
470 little sequence variation in either component over evolutionary time.

## 471 **Methods**

### 472 ***Genome sequences and 1KP data***

473 Genome sequences of 159 species were retrieved from either the Phytosome or NCBI. The  
474 assembled transcriptome data of the 1000 Plant Transcriptome Project (“1KP”) was kindly shared by the  
475 Wang lab at the University of Alberta, Canada (Matasci et al. 2014).

476

### 477 ***NGS data and analyses***

478 RNA of *Phylloglossum drummondii* was extracted using PureLink Plant RNA Reagent. A sRNA  
479 library was constructed using the Illumina TruSeq sRNA kit, and sequenced on the Illumina HiSeq  
480 platform at the University of Delaware. The sRNA data was deposited in NCBI GEO (Gene Expression  
481 Omnibus) under the accession number GSE90706.

482 sRNA and PARE data of *Marchantia polymorpha* were retrieved from NCBI Short Read Archive  
483 (SRA) under accession numbers SRR2179617 and SRR2179371, respectively (Lin et al. 2016). sRNA reads  
484 were mapped to reference genome or transcripts by Bowtie (Langmead et al. 2009), and PARE data was  
485 analyzed using Cleaveland 2.0 (Addo-Quaye et al. 2009).

486 Paired-end RNA-seq data for maize were downloaded from NCBI SRA under accession numbers  
487 SRR1213570 and SRR1213571 (Wang et al. 2015). RNA-seq reads were mapped to maize genome using  
488 STAR v2.4.2a (Dobin et al. 2013) and transcripts of the *ZmaTAS3c* locus were annotated using Cufflinks  
489 v2.2.1 (Trapnell et al. 2012). The mapped bam files of two libraries were merged and viewed using  
490 Integrative Genomics Viewer v2.3.59 (Robinson et al. 2011).

491

### 492 ***Homologous gene identification***

493 For the identification of *MIR390* genes, mature sequences of miR390 were retrieved from  
494 miRBase, and used to search for homologous sequence using FASTA36 allowing two mismatches. After  
495 that,  $\pm 500$  bp sequence were excerpted for each homologous sequence from reference sequences and  
496 used for the evaluation of secondary structure. Only those genomic loci or transcripts with a good stem  
497 loop structure ( $\leq 4$  nt mismatches and  $\leq 1$  nt bulge) and with the mature miRNA in the 5' arm were  
498 regarded as good *MIR390* genes.

499 For the identification of *TAS3* genes,  $< 500$  bp genomic loci (for genomes) or EST sequences (for  
500 transcriptome data) with evidence of at least two components of the two miR390 target sites and one

501 tasiRNA (tasiARF for vascular plants, tasiAP2 or tasiARF-a2 for bryophytes) were considered as *TAS3*  
502 candidates. Their identity as a *TAS3* gene was further assessed by manual sequence comparisons. The  
503 tool MEME (Bailey et al. 2009) was also used to profile the signature sequence motif of *TAS3* genes.

504 To identify tasiARF-targeted *ARF* genes, firstly Arabidopsis and subsequently rice ARF proteins  
505 were used as bait sequences to identify *ARF* homologous genes, using either TBLASTN for annotated  
506 genomes or 1KP transcriptome data or genBlast (She et al. 2011) for unannotated genomes. Secondly,  
507 TargetFinder (<https://github.com/carringtonlab/TargetFinder>) was used to identify tasiARF-targeted *ARF*  
508 genes. Thirdly, *ARF3/4* and *ARF2* genes were distinguished by the number of target sites as *ARF3/4*  
509 genes have two tasiARF target sites and *ARF2* genes have only one target site. AGO proteins were  
510 identified using BLASTP for selected annotated genomes or TBLASTN for 1KP data using Arabidopsis and  
511 rice AGO proteins as bait sequences. Only full-length AGO protein sequences from sequenced genomes  
512 and AGO sequences with  $\geq 800$  amino acids from the 1KP data were chosen for subsequent phylogenetic  
513 tree construction.

514

#### 515 ***Multiple alignment and tree construction***

516 Amino acid sequences of Argonautes ( $\geq 800$  amino acids), annotated from transcripts and  
517 genomes, were aligned using MUSCLE v3.8.31 with default parameters (Edgar 2004). The regions poorly  
518 aligned were trimmed using trimAl v1.4 (Capella-Gutiérrez et al. 2009), and the trimmed alignments  
519 were used for construction of a maximum likelihood (ML) tree using RAxML v8.1.1 under the GTRCAT  
520 model (Stamatakis 2014). For a tree of bryophyte *TAS3* genes (Fig. S3B), the nucleotide sequences of  
521 those genes were aligned and edited similarly, and the ML tree was made using RAxML under the  
522 PROTGAMMAAUTO model. For each tree, 100 replicates were conducted to generate bootstrap values.  
523 The trees were viewed using Dendroscope v3.5.7 (Huson and Scornavacca 2012).

524 Jalview was used for the viewing of alignment results (Waterhouse et al. 2009). The R package was  
525 used to make violin plots and conduct statistical analyses. Sequence logos of sRNA and target sites were  
526 generated using Weblogo (Crooks et al. 2004). To calculate the nucleotide diversity ( $\pi$ ) of *ARF* genes,  
527 the amino acid sequences of *ARFs* were generated by translation of the genes, aligned using MUSCLE,  
528 then the protein sequence alignment was used to generate the alignment of nucleotide sequences using  
529 PAL2NAL (Suyama et al. 2006). Subsequently, poorly aligned regions, those with  $<30\%$  nucleotide  
530 coverage, were removed, and finally the nucleotide diversity ( $\pi$ ) at a single nucleotide level was  
531 calculated using a 20 nt sliding window.

532

533

534 **Acknowledgements**

535           We thank members of the Meyers lab for helpful discussions and input. This study was supported  
536 by US National Science Foundation, Division of Integrative Organismal Systems award #1257869 and the  
537 Chinese Thousand Young Talents Program. We are grateful to Dennis Stevenson and Ryan for assistance  
538 in obtaining *Phylloglossum drummondii* material. We are also grateful to Gane Ka-Shu Wang for  
539 assistance with access to the 1KP data.

## 540 **References**

- 541 Addo-Quaye C, Miller W, Axtell MJ. 2009. CleaveLand: a pipeline for using degradome data to find  
542 cleaved small RNA targets. *Bioinformatics* **25**: 130–131.
- 543 Adenot X, Elmayan T, Laussergues D, Boutet S, Bouché N, Gascioli V, Vaucheret H. 2006. DRB4-  
544 dependent TAS3 trans-acting siRNAs control leaf morphology through AGO7. *Curr Biol* **16**: 927–932.
- 545 Allen E, Xie Z, Gustafson AM, Carrington JC. 2005. microRNA-directed phasing during trans-acting siRNA  
546 biogenesis in plants. *Cell* **121**: 207–221.
- 547 Arif MA, Fattash I, Ma Z, Cho SH, Beike AK, Reski R, Axtell MJ, Frank W. 2012. DICER-LIKE3 activity in  
548 *physcomitrella patens* DICER-LIKE4 mutants causes severe developmental dysfunction and sterility.  
549 *Mol Plant* **5**: 1281–1294.
- 550 Axtell MJ. 2013. Classification and comparison of small RNAs from plants. *Annu Rev Plant Biol* **64**: 137–  
551 159.
- 552 Axtell MJ, Jan C, Rajagopalan R, Bartel DP. 2006. A two-hit trigger for siRNA biogenesis in plants. *Cell* **127**:  
553 565–577.
- 554 Axtell MJ, Snyder JA, Bartel DP. 2007. Common functions for diverse small RNAs of land plants. *Plant Cell*  
555 **19**: 1750–1769.
- 556 Bailey TL, Boden M, Buske FA, Frith M, Grant CE, Clementi L, Ren J, Li WW, Noble WS. 2009. MEME Suite:  
557 Tools for motif discovery and searching. *Nucleic Acids Res* **37**: 202–208.
- 558 Bartel DP. 2009. MicroRNAs: target recognition and regulatory functions. *Cell* **136**: 215–233.
- 559 Bologna NG, Mateos JL, Bresso EG, Palatnik JF. 2009. A loop-to-base processing mechanism underlies  
560 the biogenesis of plant microRNAs miR319 and miR159. *EMBO J* **28**: 3646–3656.
- 561 Bologna NG, Schapire AL, Zhai J, Bologna G, Schapire AL, Zhai J, Chorostecki U, Boisbouvier J, Meyers BC,  
562 Palatnik JF. 2013. Multiple RNA recognition patterns during microRNA biogenesis in plants.  
563 *Genome Res* **23**: 1675–1689.
- 564 Brousse C, Liu Q, Beauclair L, Deremetz A, Axtell MJ, Bouché N. 2014. A non-canonical plant microRNA  
565 target site. *Nucleic Acids Res* **42**: 5270–5279.
- 566 Capella-Gutiérrez S, Silla-Martínez JM, Gabaldón T. 2009. trimAl: A tool for automated alignment  
567 trimming in large-scale phylogenetic analyses. *Bioinformatics* **25**: 1972–1973.
- 568 Chen X. 2009. Small RNAs and their roles in plant development. *Annu Rev Cell Dev Biol* **25**: 21–44.
- 569 Crooks G, Hon G, Chandonia J, Brenner S. 2004. WebLogo: a sequence logo generator. *Genome Res* **14**:  
570 1188–1190.
- 571 Dobin A, Davis CA, Schlesinger F, Drenkow J, Zaleski C, Jha S, Batut P, Chaisson M, Gingeras TR. 2013.

- 572 STAR: ultrafast universal RNA-seq aligner. *Bioinformatics* 1–7.
- 573 Dotto MC, Petsch KA, Aukerman MJ, Beatty M, Hammell M, Timmermans MCP. 2014. Genome-wide  
574 analysis of *leafbladeless1*-regulated and phased small RNAs underscores the importance of the  
575 *TAS3* ta-siRNA pathway to maize development. *PLoS Genet* **10**: e1004826.
- 576 Edgar RC. 2004. MUSCLE: Multiple sequence alignment with high accuracy and high throughput. *Nucleic  
577 Acids Res* **32**: 1792–1797.
- 578 Fahlgren N, Jogdeo S, Kasschau KD, Sullivan CM, Chapman EJ, Laubinger S, Smith LM, Dasenko M, Givan  
579 SA, Weigel D, et al. 2010. MicroRNA gene evolution in *Arabidopsis lyrata* and *Arabidopsis thaliana*.  
580 *Plant Cell* **22**: 1074–89.
- 581 Fahlgren N, Montgomery TA, Howell MD, Allen E, Dvorak SK, Alexander AL, Carrington JC. 2006.  
582 Regulation of *AUXIN RESPONSE FACTOR3* by *TAS3* ta-siRNA affects developmental timing and  
583 patterning in *Arabidopsis*. *Curr Biol* **16**: 939–944.
- 584 Finet C, Berne-Dedieu A, Scutt CP, Marlétaz F. 2013. Evolution of the *ARF* gene family in land plants: Old  
585 domains, new tricks. *Mol Biol Evol* **30**: 45–56.
- 586 Garcia D, Collier SA, Byrne ME, Martienssen RA. 2006. Specification of leaf polarity in *Arabidopsis* via the  
587 trans-acting siRNA pathway. *Curr Biol* **16**: 933–938.
- 588 Guilfoyle TJ, Hagen G. 2007. Auxin response factors. *Curr Opin Plant Biol* **10**: 453–460.
- 589 Howell MD, Fahlgren N, Chapman EJ, Cumbie JS, Sullivan CM, Givan S a, Kasschau KD, Carrington JC.  
590 2007. Genome-wide analysis of the RNA-DEPENDENT RNA POLYMERASE6/DICER-LIKE4 pathway in  
591 *Arabidopsis* reveals dependency on miRNA- and tasiRNA-directed targeting. *Plant Cell* **19**: 926–942.
- 592 Hunter C, Willmann MR, Wu G, Yoshikawa M, de la Luz Gutiérrez-Nava M, Poethig SR. 2006. Trans-acting  
593 siRNA-mediated repression of *ETTIN* and *ARF4* regulates heteroblasty in *Arabidopsis*. *Development*  
594 **133**: 2973–2981.
- 595 Huson DH, Scornavacca C. 2012. Dendroscope 3: An interactive tool for rooted phylogenetic trees and  
596 networks. *Syst Biol* **61**: 1061–1067.
- 597 Jones-Rhoades MW, Bartel DP, Bartel B. 2006. MicroRNAs and their regulatory roles in plants. *Annu Rev  
598 Plant Biol* **57**: 19–53.
- 599 Krasnikova MS, Goryunov D V, Troitsky A V, Solovyev AG, Ozerova L V, Morozov SY. 2013. Peculiar  
600 evolutionary history of miR390-guided *TAS3-like* genes in land plants. *Sci World J* **2013**.
- 601 Langmead B, Trapnell C, Pop M, Salzberg SL. 2009. Ultrafast and memory-efficient alignment of short  
602 DNA sequences to the human genome. *Genome Biol* **10**: R25.
- 603 Li Z, Baniaga AE, Sessa EB, Scascitelli M, Graham SW, Rieseberg LH, Barker MS. 2015. Early genome

- 604 duplications in conifers and other seed plants. *Sci Adv* **1**: e1501084.
- 605 Lin PC, Lu CW, Shen BN, Lee GZ, Bowman JL, Arteaga-Vazquez MA, Daisy Liu LY, Hong SF, Lo CF, Su GM,  
606 et al. 2016. Identification of miRNAs and their targets in the liverwort *Marchantia polymorpha* by  
607 integrating RNA-Seq and degradome analyses. *Plant Cell Physiol* **57**: 339–358.
- 608 Ma Z, Coruh C, Axtell MJ. 2010. *Arabidopsis lyrata* small RNAs: transient *MIRNA* and small interfering  
609 RNA loci within the *Arabidopsis* genus. *Plant Cell* **22**: 1090–103.
- 610 Mallory A, Vaucheret H. 2010. Form, function, and regulation of ARGONAUTE proteins. *Plant Cell* **22**:  
611 3879–3889.
- 612 Marin E, Jouannet V, Herz A, Lokerse AS, Weijers D, Vaucheret H, Nussaume L, Crespi MD, Maizel A.  
613 2010. miR390, *Arabidopsis TAS3* tasiRNAs, and their *AUXIN RESPONSE FACTOR* targets define an  
614 autoregulatory network quantitatively regulating lateral root growth. *Plant Cell* **22**: 1104–1117.
- 615 Matasci N, Hung L-H, Yan Z, Carpenter EJ, Wickett NJ, Mirarab S, Nguyen N, Warnow T, Ayyampalayam S,  
616 Barker MS, et al. 2014. Data access for the 1,000 Plants (1KP) project. *Gigascience* **3**: 17.
- 617 Mateos JL, Bologna NG, Chorostecki U, Palatnik JF. 2010. Identification of microRNA processing  
618 determinants by random mutagenesis of *Arabidopsis MIR172a* precursor. *Curr Biol* **20**: 49–54.
- 619 Montgomery T a., Howell MD, Cuperus JT, Li D, Hansen JE, Alexander AL, Chapman EJ, Fahlgren N, Allen  
620 E, Carrington JC. 2008a. Specificity of ARGONAUTE7-miR390 interaction and dual functionality in  
621 *TAS3* trans-acting siRNA formation. *Cell* **133**: 128–141.
- 622 Montgomery T a, Yoo SJ, Fahlgren N, Gilbert SD, Howell MD, Sullivan CM, Alexander A, Nguyen G, Allen E,  
623 Ahn JH, et al. 2008b. AGO1-miR173 complex initiates phased siRNA formation in plants. *Proc Natl*  
624 *Acad Sci U S A* **105**: 20055–20062.
- 625 Rajeswaran R, Pooggin MM. 2012. RDR6-mediated synthesis of complementary RNA is terminated by  
626 miRNA stably bound to template RNA. *Nucleic Acids Res* **40**: 594–599.
- 627 Robinson JT, Thorvaldsdóttir H, Winckler W, Guttman M, Lander ES, Getz G, Mesirov JP. 2011.  
628 Integrative Genomics Viewer. *Nat Biotechnol* **29**: 24–26.
- 629 She R, Chu JSC, Uyar B, Wang J, Wang K, Chen N. 2011. genBlastG: Using BLAST searches to build  
630 homologous gene models. *Bioinformatics* **27**: 2141–2143.
- 631 Song L, Axtell MJ, Fedoroff N V. 2010. RNA secondary structural determinants of miRNA precursor  
632 processing in *Arabidopsis*. *Curr Biol* **20**: 37–41.
- 633 Stamatakis A. 2014. RAxML version 8: A tool for phylogenetic analysis and post-analysis of large  
634 phylogenies. *Bioinformatics* **30**: 1312–1313.
- 635 Suyama M, Torrents D, Bork P. 2006. PAL2NAL: Robust conversion of protein sequence alignments into

- 636 the corresponding codon alignments. *Nucleic Acids Res* **34**: 609–612.
- 637 Trapnell C, Roberts A, Goff L, Pertea G, Kim D, Kelley DR, Pimentel H, Salzberg SL, Rinn JL, Pachter L. 2012.
- 638 Differential gene and transcript expression analysis of RNA-seq experiments with TopHat and
- 639 Cufflinks. *Nat Protoc* **7**: 562–78.
- 640 Vaucheret H. 2008. Plant ARGONAUTES. *Trends Plant Sci* **13**: 350–358.
- 641 Wang H, Niu QW, Wu HW, Liu J, Ye J, Yu N, Chua NH. 2015. Analysis of non-coding transcriptome in rice
- 642 and maize uncovers roles of conserved lncRNAs associated with agriculture traits. *Plant J* **84**: 404–
- 643 416.
- 644 Waterhouse AM, Procter JB, Martin DMA, Clamp M, Barton GJ. 2009. Jalview Version 2-A multiple
- 645 sequence alignment editor and analysis workbench. *Bioinformatics* **25**: 1189–1191.
- 646 Werner S, Wollmann H, Schneeberger K, Weigel D. 2010. Structure determinants for accurate processing
- 647 of miR172a in *Arabidopsis thaliana*. *Curr Biol* **20**: 42–48.
- 648 Xia R, Xu J, Arikait S, Meyers BC. 2015a. Extensive families of miRNAs and PHAS loci in norway spruce
- 649 demonstrate the origins of complex phasiRNA networks in seed plants. *Mol Biol Evol* **32**: 2905–
- 650 2918.
- 651 Xia R, Ye S, Liu Z, Meyers BC, Liu Z. 2015b. Novel and recently evolved microRNA clusters regulate
- 652 expansive *F-BOX* gene networks through phased small interfering RNAs in wild diploid strawberry.
- 653 *Plant Physiol* **169**: 594–610.
- 654 Xia R, Zhu H, An Y, Beers EP, Liu Z. 2012. Apple miRNAs and tasiRNAs with novel regulatory networks.
- 655 *Genome Biol* **13**: R47.
- 656 Yifhar T, Pekker I, Peled D, Friedlander G, Pistunov A, Sabban M, Wachsmann G, Alvarez JP, Amsellem Z,
- 657 Eshed Y. 2012. Failure of the tomato trans-acting short interfering RNA program to regulate AUXIN
- 658 RESPONSE FACTOR3 and ARF4 underlies the wiry leaf syndrome. *Plant Cell* **24**: 3575–3589.
- 659 Yoshikawa M, Peragine A, Park MY, Poethig RS. 2005. A pathway for the biogenesis of trans-acting
- 660 siRNAs in Arabidopsis. *Genes Dev* **19**: 2164–2175.
- 661 Zhang H, Xia R, Meyers BC, Walbot V. 2015. Evolution, functions, and mysteries of plant ARGONAUTE
- 662 proteins. *Curr Opin Plant Biol* **27**: 84–90.
- 663 Zhang Y, Xia R, Kuang H, Meyers BC. 2016. The diversification of plant *NBS-LRR* defense genes directs the
- 664 evolution of microRNAs that target them. *Mol Biol Evol* **33**: 2692–2705.
- 665 Zhou C, Han L, Fu C, Wen J, Cheng X, Nakashima J, Ma J, Tang Y, Tan Y, Tadege M, et al. 2013. The trans-
- 666 acting short interfering RNA3 pathway and NO APICAL MERISTEM antagonistically regulate leaf
- 667 margin development and lateral organ separation, as revealed by analysis of an *argonaute7/lobed*



668 *leaflet1* mutant in *Medicago truncatula*. *Plant Cell* **25**: 4845–4862.

669

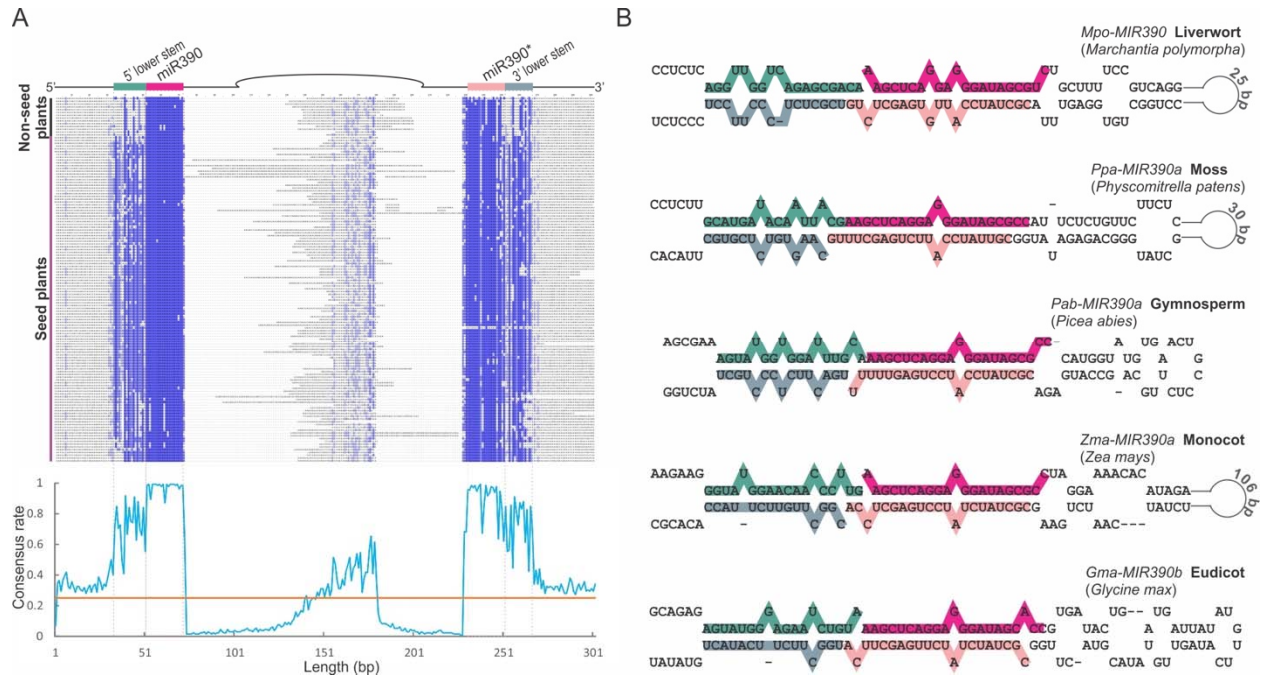

**Figure 1. The lower stem region of *MIR390* is conserved in land plants.**

(A) Nucleotide sequence alignment of *MIR390* precursor genes ( $\pm 50$  bp before/after the miR390/miR390\* region) with different sequence regions denoted above. The consensus rate of diversity of each position in the alignment is shown in the plot below with the orange line indicating the 25% level, since in a sequence randomized by neutral evolution, each nucleotide (A/U/C/G) would comprise 25% of each position. (B) Examples of stem-loop structures of *MIR390* precursor transcripts. The miRNA and lower-stem regions are indicated according to the colors shown in the top of panel A.



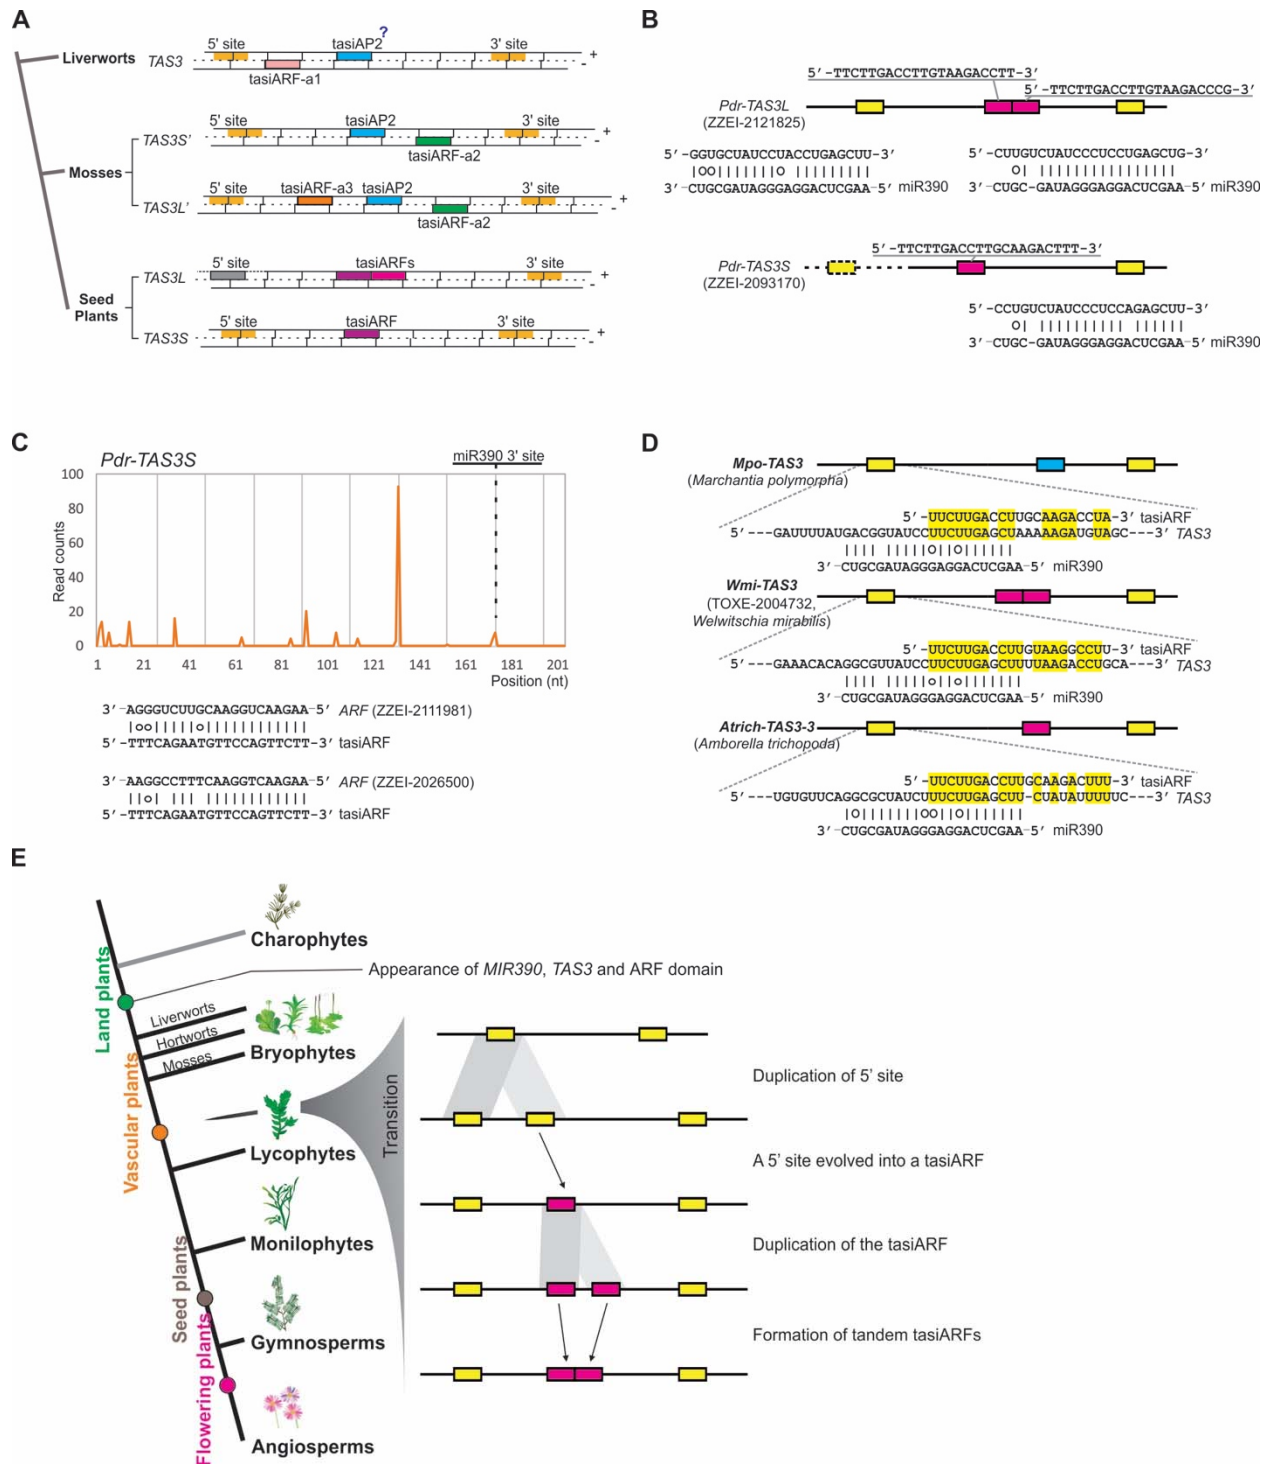

**Figure 3. The inferred evolutionary progression of *TAS3* genes in land plants.**

(A) A summary of *TAS3* gene structures observed in land plants. Colored bars denote different features, as indicated; the grey 5' miR390 site is not cleaved. The question mark “?” denotes that the function of tasiAP2 (targeting AP2 genes) could not be validated in liverworts. (B) Two *TAS3* gene structures found in the lycoplyte species, *Phylloglossum drummodii*. (C) *TAS3*

transcripts produce tasiARFs to regulate *ARF* genes in *Phylloglossum drummodii*. (D) tasiARF shows sequence similarity to the region partially covering the 5' miR390 target site of cognate *TAS3* genes. Three representative *TAS3* genes from different species are displayed here. Identical nucleotides between tasiARF and the region partially covering the 5' miR390 target site are highlighted in yellow. (E) An evolutionary model for the divergence of *TAS3* genes in land plants. The tasiARF sequence originated from the duplication of the 5' miR390 target site and the *TAS3S* genes (with a single tasiARF) might be the ancestor of the *TAS3L* genes (with two tandem tasiARFs).

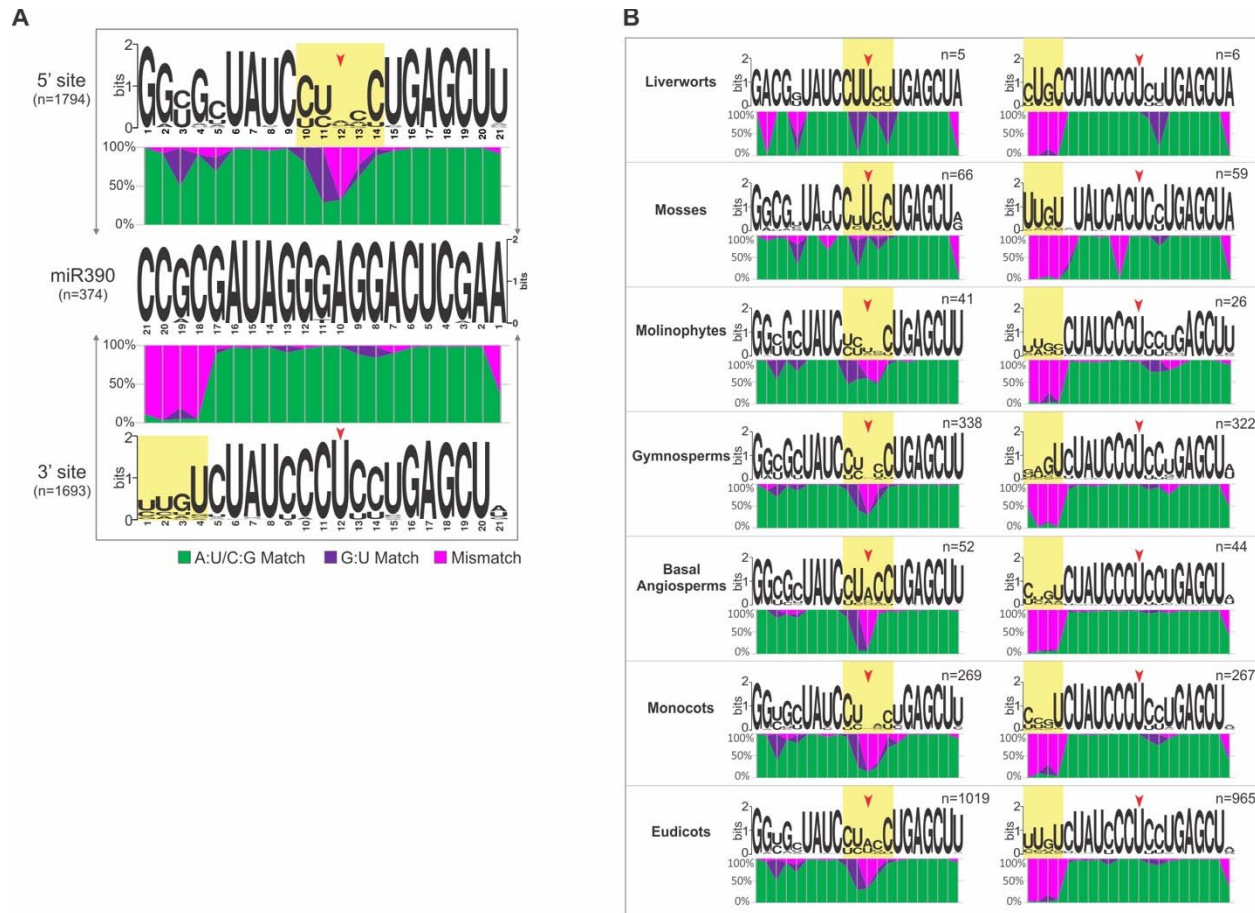

**Figure 4. Pairing features and evolutionary variation of the two target sites of miR390 in *TAS3* genes.**

(A) Distinct pairing patterns of the two miR390 target sites in *TAS3* genes. Sequence logos were generated using WebLogo. Different nucleotide pairings at each position in the target site (compared to the highly conserved miR390 sequence in the middle) are indicated by different colors, with A:U/C:G matches denoted in green, G:U matches in purple, and all mismatches in pink. The red arrow marks the 10<sup>th</sup> position, relative to the 5' end of miR390. The yellow shading indicates regions of substantially imperfect pairing. The upper graph shows the 5' target site of *TAS3*, the lower graph shows the 3' target site; the number of sequences analyzed is indicated for each panel. (B) Variation in the pairing of the two miR390 target sites in *TAS3* genes in different species or lineages of land plants. The images are as described for panel A, but the left graph shows the analysis of the 5' target sites of *TAS3*, and the right graph shows the analysis of the 3' target sites.

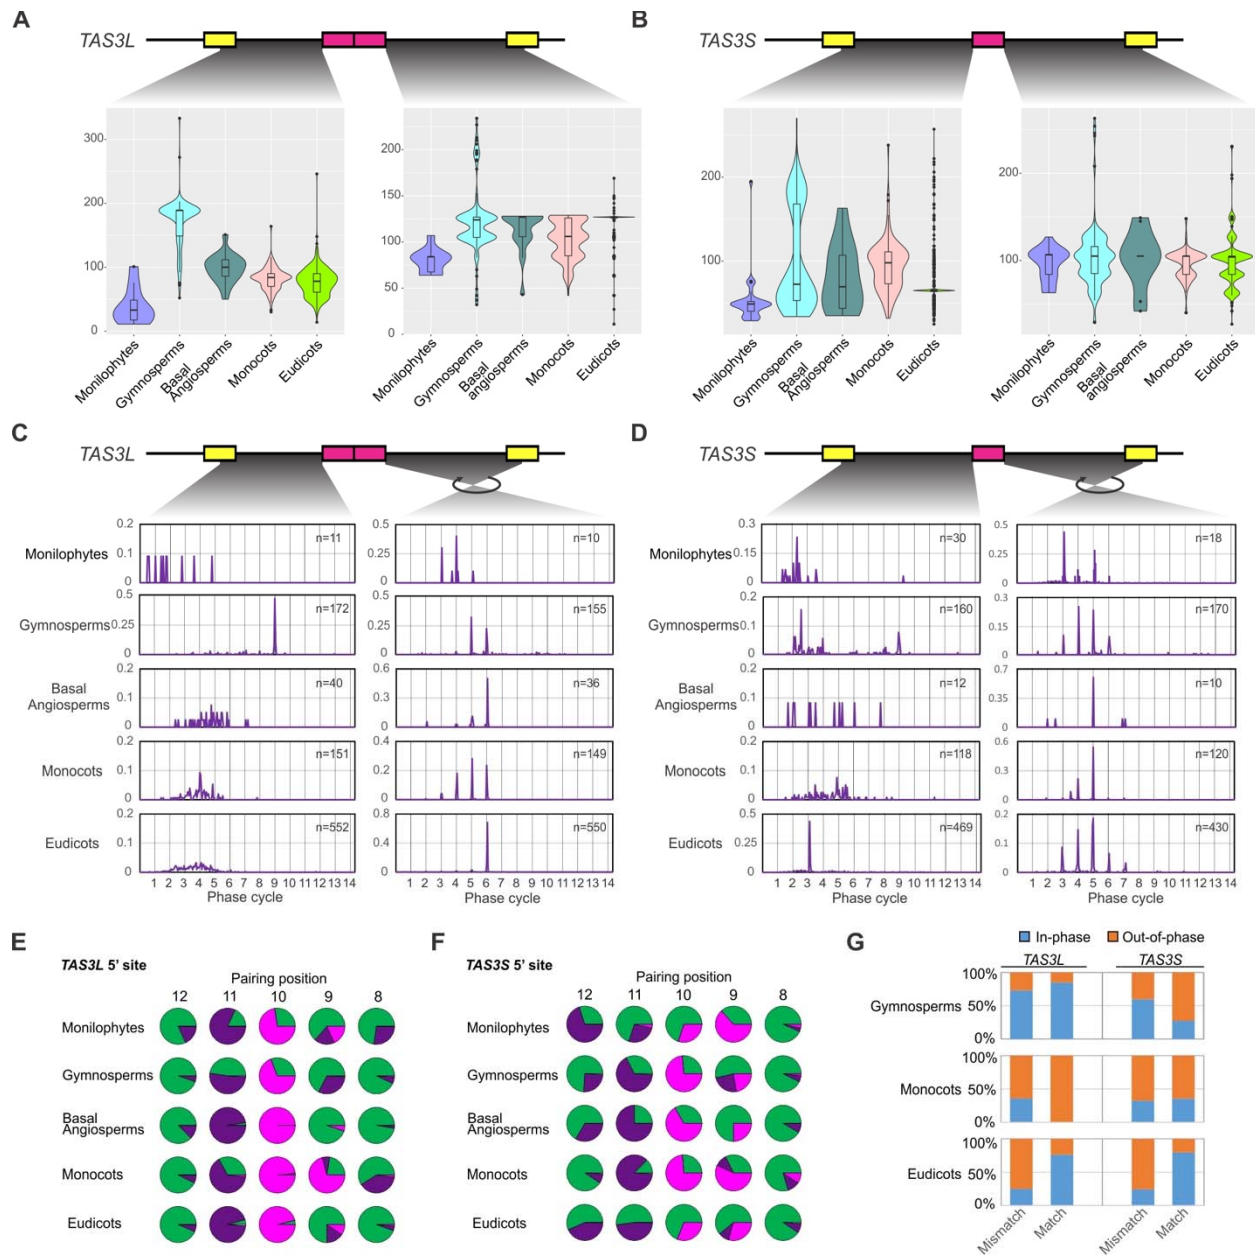

**Figure 5. The distances between the two target sites of miR390 and the central tasiARF are under strong selection.**

Panels (A) and (B) display the variation of the distances between two miR390 target sites and tasiARF of *TAS3L* (panel A) or *TAS3S* (panel B) genes in different lineages of vascular plants. In both panels, the lower graphs contain violin plots for each lineage representing the distribution of these distances; internal boxes represent the median as a heavy line surrounded by a box defining the upper and lower quartiles. Panels (C) and (D) display the distribution of the distances between two miR390 target sites and tasiARF of *TAS3L* (C) or *TAS3S* (D) genes in different lineages of vascular plants. The Y-axis is the percentage of *TAS3* genes with distances occurring within a given position (the X-axis). The 21-nt phased positions (phase “cycles”) are marked as grey gridlines. Panels (E) and (F) display the variation in pairing of the 8<sup>th</sup> to 12<sup>th</sup>

nucleotide positions (relative to the 5' end of miR390) of the 5' target site of *TAS3L* (E) and *TAS3S* (F). The type of miR390-*TAS3* pairing observed at different nucleotide positions, relative to the 5' end of miR390, with A:U/C:G matches denoted in green, G:U matches in purple, and all mismatches in pink. (G) Ratio of the 5' miR390 target sites in phase or out-of-phase to the tasiARF in terms of different nucleotide pairing at the 10<sup>th</sup> position (match: U; mismatches: A, C, G as the 10<sup>th</sup> nucleotide of miR390 is "A").



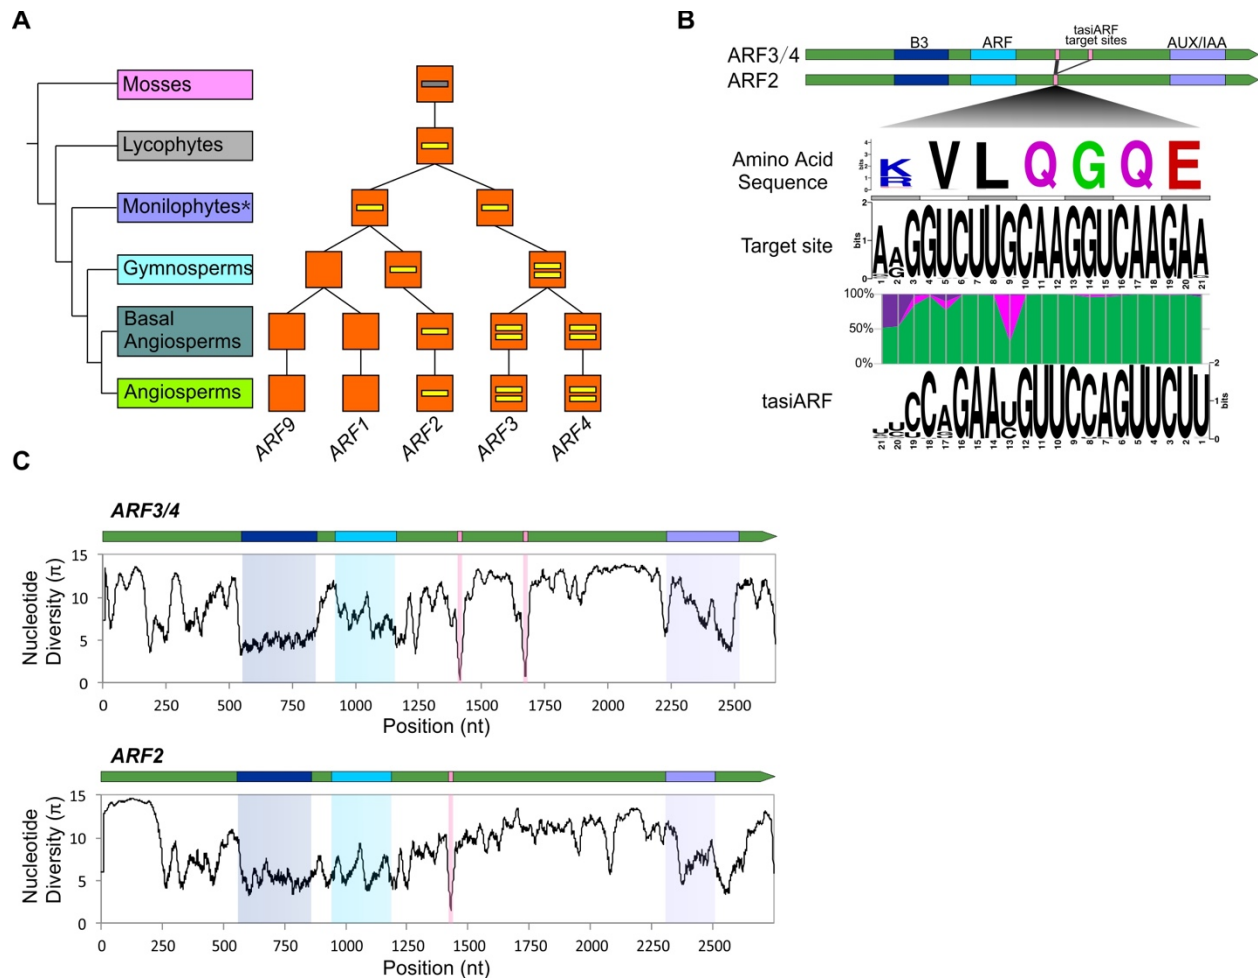

**Figure 6. Evolutionary diversification of *tasiARF* target sites in *ARF* genes.**

(A) Evolution of the number of *tasiARF* target sites in plant *ARF* genes. The evolutionary route of *ARF* genes was adapted from Finet *et al.* (2012). The number of short yellow lines in orange boxes denote the number of *tasiARF* target sites. The grey line means that there are potential *tasiARF* target sites in *ARF* genes in mosses. In monilophytes (marked with a “\*”), some *ARF3/4* homologous genes have already evolved two *tasiARF* target sites. (B) Sequence features of the target site of *tasiARF* in *ARF* genes and their encoded proteins. Gene structures of *tasiARF*-targeted *ARF2/3/4* are displayed on the top, including the encoded protein motifs, with the *tasiARF* target site indicated as pink bars. The target site encodes a short peptide with a consensus sequence of K/RVLQGQE, as indicated with the encoding sequence. Pairing between *tasiARF* and its target site is color-coded with A:U/C:G matches denoted in green, G:U matches in purple, and all mismatches in pink. (C) Distribution of nucleotide diversity along *tasiARF*-targeted *ARF2/3/4* genes, with the encoded functional domains and *tasiARF* target site marked in colors according to those in panel B.
